# Supplementary material
Source: PubMed Central journal article supplement (PMC4148882)
Supplement: supp_M114.572701_jbc.M114.572701-1.pdf [file supp_M114.572701_jbc.M114.572701-1.pdf]

## Supplemental Data

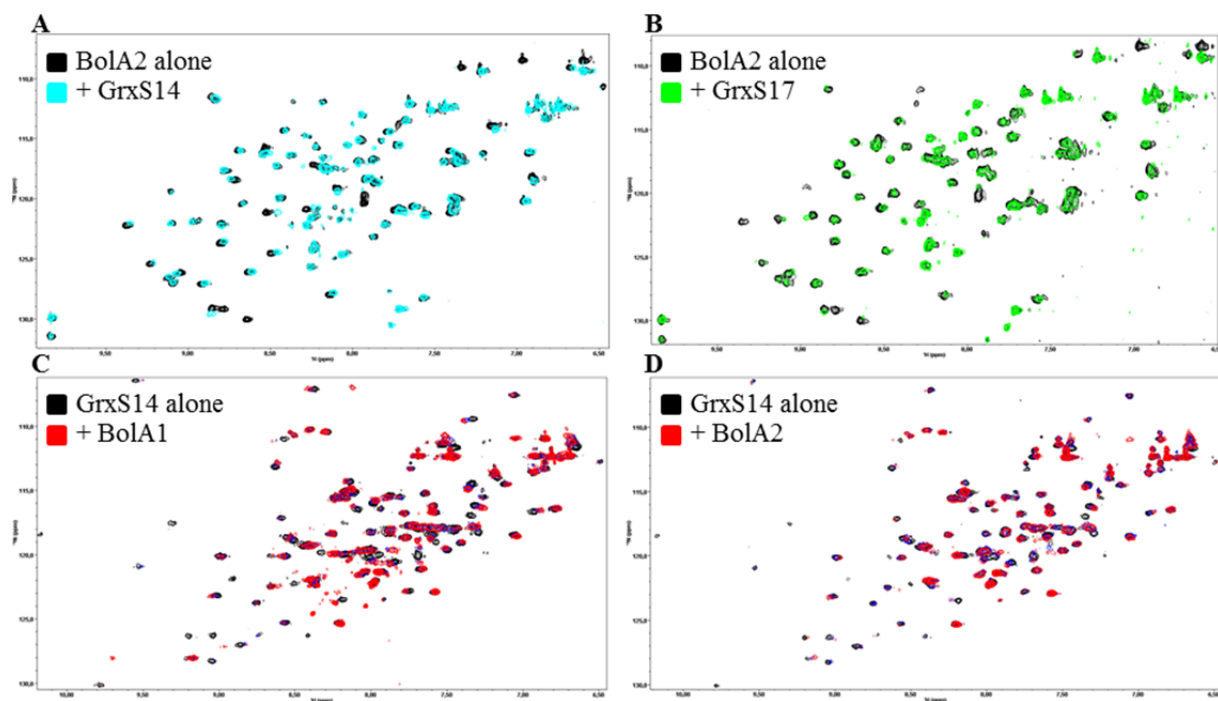

**Figure S1.  $^1\text{H}$ - $^{15}\text{N}$  HSQC NMR experiments**

AtBolA2 is alone (black) or with 1 equivalent of AtGrxS14 (A) and AtGrxS17 (B) (blue and green respectively) at pH 7.0 and 288K. AtGrxS14 is alone (black) or with 1 equivalent of AtBolA1 (C) and AtBolA2 (D) (red) at pH 7.0 and 288K.



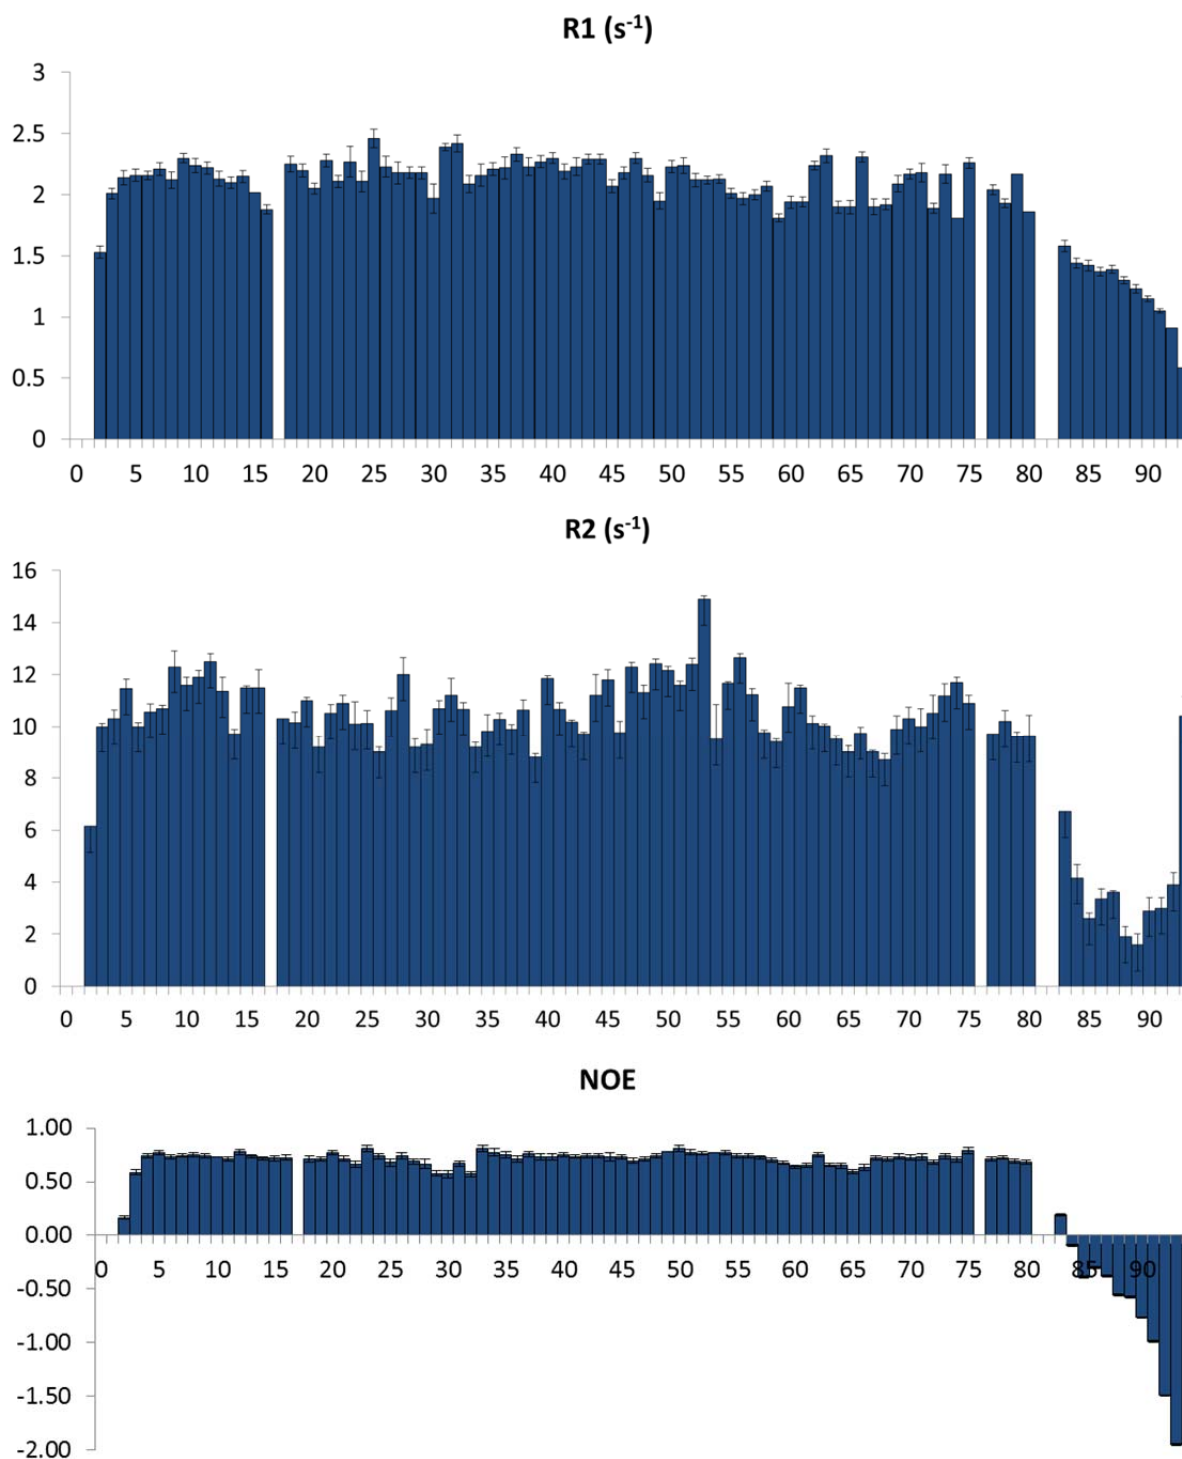

**Figure S3. <sup>15</sup>N backbone relaxation measurements**

$R_1$ ,  $R_2$ , and [<sup>1</sup>H, <sup>15</sup>N] heteronuclear NOE plotted as function of the residue number for AtBola2. The [<sup>1</sup>H, <sup>15</sup>N] heteronuclear NOE negative values observed for the 10 C-terminal residues indicate that this tail is totally unstructured which may have hampered crystallization. In fact, structural disorder in N- and C-terminal extensions can also be noticed in the NMR models of Bola1 from *M. musculus* and *E. coli*.
